# Supplementary material for: Treatment patterns and control of hypertension in systemic lupus erythematosus (SLE): a cross-sectional study
Source: PubMed Central journal article supplement — BMJ Open. 2021 Nov 1;11(11):e048384. doi: 10.1136/bmjopen-2020-048384 (PMC8562504; doi:10.1136/bmjopen-2020-048384), 2021-11-01
Supplement: bmjopen-2020-048384.draft_revisions.pdf [file bmjopen-2020-048384.draft_revisions.pdf]

# BMJ Open

BMJ Open is committed to open peer review. As part of this commitment we make the peer review history of every article we publish publicly available.

When an article is published we post the peer reviewers' comments and the authors' responses online. We also post the versions of the paper that were used during peer review. These are the versions that the peer review comments apply to.

The versions of the paper that follow are the versions that were submitted during the peer review process. They are not the versions of record or the final published versions. They should not be cited or distributed as the published version of this manuscript.

BMJ Open is an open access journal and the full, final, typeset and author-corrected version of record of the manuscript is available on our site with no access controls, subscription charges or pay-per-view fees (<http://bmjopen.bmj.com>).

If you have any questions on BMJ Open's open peer review process please email [info.bmjopen@bmj.com](mailto:info.bmjopen@bmj.com)

# BMJ Open

## Treatment Patterns and Control of Hypertension in Systemic Lupus Erythematosus (SLE)

|                               |                                                                                                                                                                                                                                                                                                                                                                                                                                                                                                                                             |
|-------------------------------|---------------------------------------------------------------------------------------------------------------------------------------------------------------------------------------------------------------------------------------------------------------------------------------------------------------------------------------------------------------------------------------------------------------------------------------------------------------------------------------------------------------------------------------------|
| Journal:                      | <i>BMJ Open</i>                                                                                                                                                                                                                                                                                                                                                                                                                                                                                                                             |
| Manuscript ID                 | bmjopen-2020-048384                                                                                                                                                                                                                                                                                                                                                                                                                                                                                                                         |
| Article Type:                 | Original research                                                                                                                                                                                                                                                                                                                                                                                                                                                                                                                           |
| Date Submitted by the Author: | 23-Dec-2020                                                                                                                                                                                                                                                                                                                                                                                                                                                                                                                                 |
| Complete List of Authors:     | Li Liu, Jia; McGill University<br>Pineau, Christian; McGill University Health Centre, Rheumatology<br>Grenier, Louis-Pierre; McGill University Health Centre<br>Vinet, Evelyne; McGill University Health Centre, Rheumatology<br>Kalache, Fares; McGill University Health Centre<br>Lukusa, Luck; Research Institute of the McGill University Health Centre, Centre for Outcomes Research & Evaluation (CORE)<br>Bernatsky, Sasha; Research Institute of the McGill University Health Centre; McGill University Health Centre, Rheumatology |
| Keywords:                     | EPIDEMIOLOGY, RHEUMATOLOGY, Hypertension < CARDIOLOGY, Protocols & guidelines < HEALTH SERVICES ADMINISTRATION & MANAGEMENT                                                                                                                                                                                                                                                                                                                                                                                                                 |
|                               |                                                                                                                                                                                                                                                                                                                                                                                                                                                                                                                                             |

SCHOLARONE™  
Manuscripts

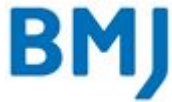

I, the Submitting Author has the right to grant and does grant on behalf of all authors of the Work (as defined in the below author licence), an exclusive licence and/or a non-exclusive licence for contributions from authors who are: i) UK Crown employees; ii) where BMJ has agreed a CC-BY licence shall apply, and/or iii) in accordance with the terms applicable for US Federal Government officers or employees acting as part of their official duties; on a worldwide, perpetual, irrevocable, royalty-free basis to BMJ Publishing Group Ltd ("BMJ") its licensees and where the relevant Journal is co-owned by BMJ to the co-owners of the Journal, to publish the Work in this journal and any other BMJ products and to exploit all rights, as set out in our [licence](#).

The Submitting Author accepts and understands that any supply made under these terms is made by BMJ to the Submitting Author unless you are acting as an employee on behalf of your employer or a postgraduate student of an affiliated institution which is paying any applicable article publishing charge ("APC") for Open Access articles. Where the Submitting Author wishes to make the Work available on an Open Access basis (and intends to pay the relevant APC), the terms of reuse of such Open Access shall be governed by a Creative Commons licence – details of these licences and which [Creative Commons](#) licence will apply to this Work are set out in our licence referred to above.

Other than as permitted in any relevant BMJ Author's Self Archiving Policies, I confirm this Work has not been accepted for publication elsewhere, is not being considered for publication elsewhere and does not duplicate material already published. I confirm all authors consent to publication of this Work and authorise the granting of this licence.

**Full title of manuscript:**

Treatment Patterns and Control of Hypertension in Systemic Lupus Erythematosus (SLE)

**Complete given names and surnames of all authors with ORCID ID if any:**

Jia Li Liu<sup>1</sup>

Christian A. Pineau<sup>1,2</sup> (ORCID 0000-0002-4966-1526)

Louis-Pierre Grenier<sup>2</sup>

Evelyne Vinet<sup>1,2</sup> (ORCID 0000-0001-7727-5879)

Fares Kalache<sup>2</sup>

Luck Lukusa<sup>2</sup>

Sasha Bernatsky<sup>1,2</sup> (ORCID 0000-0002-9515-2802)

**Key Indexing Terms:**

systemic lupus erythematosus, hypertension, antihypertensive agents, guideline, risk factors

**Name of department(s) and institution(s) to which the work should be attributed:**

<sup>1</sup> McGill University, Montreal <sup>2</sup> McGill University Health Centre, Montreal

**The source(s) of support in the form of grants or industrial support:**

The McGill University Health Center Lupus Clinic research activities are funded by the Singer Family Fund for Lupus Research. Ms. Liu is the recipient of a research-based summer studentship from the Canadian Rheumatology Association, as well as a research bursary from the McGill Faculty of Medicine.

**Conflict of interest:**

The authors declare no conflict of interest.

**Initials, surnames, appointments, and highest academic degrees of all authors (e.g., MD, PhD):**

J. L. Liu, MD Candidate

C. A. Pineau, MD

L. Grenier, MD

E. Vinet, MD, PhD

F. Kalache, MD

L. Lukusa, MSc

S. Bernatsky, MD, PhD

**Contributorship:**

JLL contributed to the design, interpretation of the data and writing of the manuscript. CAP, LPG, EV FK contributed to the collection of cohort data, design, interpretation of the data and writing of the manuscript. LL contributed to the design, analysis, and interpretation of the data. SB contributed to the collection of cohort data, conception, design, interpretation of the data and writing of the manuscript. All authors read and approved the final version of the manuscript.

**Acknowledgements:** None

**Data sharing statement:** All data relevant to the study are included in the article or uploaded as supplementary information.

**Patient and Public Involvement statement:** Patients and/or the public were not involved in the design, or conduct, or reporting, or dissemination plans of this research.

**Name, address, and e-mail of author responsible for correspondence:**

Dr. S. Bernatsky, Research Institute of the McGill University Health Centre, Division of Clinical Epidemiology, 5252 Boul. de Maisonneuve Ouest, 3F.51, Montreal, Quebec H4A 3S5, Canada. E-mail: [sasha.bernatsky@mcgill.ca](mailto:sasha.bernatsky@mcgill.ca)

**Short running head (maximum of 4 words):**

SLE blood pressure control

1  
2  
3  
4  
5 Objective: Hypertension (HTN) is common in SLE, representing a key risk factor for  
6 cardiovascular and renal disease. We described HTN treatment patterns in SLE, evaluated  
7 uncontrolled HTN according to Canadian and American guidelines, and identified factors  
8 associated with uncontrolled HTN.  
9  
10  
11  
12  
13

14 Methods: We performed a cross-sectional study, identifying all McGill Lupus Clinic registry  
15 patients with an annual visit between January 2017 and May 2019 who were taking HTN  
16 medications. We excluded those taking medications only for another indication (e.g.  
17 Raynaud's). We determined the frequency of uncontrolled HTN according to Canadian and  
18 ACC/AHA guidelines. Multivariate logistic regression (adjusted for age, sex, and race/ethnicity)  
19 evaluated if uncontrolled HTN was more common with high body mass index (BMI), longer SLE  
20 duration, high disease activity, renal damage, multiple concomitant antihypertensives,  
21 prednisone and NSAIDs.  
22  
23  
24  
25  
26  
27  
28  
29  
30

31 Results: Of 442 SLE patients, 108 were taking medications to treat HTN, and 38 took multiple  
32 medications concurrently. Angiotensin-receptor blockers were most common, followed by  
33 calcium-channel blockers, diuretics, angiotensin-converting enzyme inhibitors, and beta-  
34 blockers. Among the 108 patients, 39.8% (n=43) had blood pressure >140/90 mmHg, while  
35 66.7% (n=72) had blood pressure >130/80 mmHg. In multivariate analyses, uncontrolled HTN  
36 (>130/80 mmHg) was more likely in Caucasians (OR 2.72, 95% CI 1.12-6.78) and patients with  
37 higher BMI (OR 1.08, 95% CI 1.00-1.19). Patients with renal damage had better HTN control (OR  
38 0.39, 95% CI 0.16-0.97). We could not draw definitive conclusions regarding other variables.  
39  
40  
41  
42  
43  
44  
45  
46

47 Conclusion: Caucasians and patients with higher BMI had more uncontrolled HTN. The negative  
48 association with renal damage is reassuring, as controlled BP is key for renal protection.  
49  
50  
51  
52  
53  
54  
55  
56  
57  
58  
59  
60

### Strengths and limitations of this study

- Hypertension is a common comorbidity of SLE, therefore understanding and addressing risk factors to suboptimal control is crucial to avoid future cardiovascular and renal consequences.
- Our study was performed on a large cohort of SLE patients who receive annual standardized evaluations of clinical characteristics.
- Results were computed using multivariate logistic regression analyses adjusted for age, sex, and race/ethnicity.
- The cross-sectional nature of our study does not permit assumption of causal inferences.

## Introduction

In systemic lupus erythematosus (SLE), hypertension (HTN) is common (1,2) and represents a major, correctable risk factor for cardiovascular disease and renal damage, two frequent adverse outcomes in SLE (3,4). Certain SLE patient subgroups have traditionally had worse disease outcome, including older patients, males, non-Caucasians, those with active disease, high body mass index (BMI), and renal damage (5-8). To our knowledge, data on risk factors leading to uncontrolled HTN in SLE patients remain scarce. We conducted an assessment of the McGill University Health Center Lupus Clinic registry to describe HTN treatment patterns, evaluate the prevalence of uncontrolled HTN according to Hypertension Canada and the more stringent American College of Cardiology/American Heart Association (ACC/AHA) guidelines for HTN, and assess uncontrolled HTN in the traditionally vulnerable groups of males, non-Caucasians, older SLE patients, as well as patients with high BMI, active SLE, or renal damage. The effects of prednisone and NSAID use on uncontrolled HTN were also evaluated.

## Materials and Methods

We conducted a cross-sectional assessment of data extracted from the McGill University Health Center Lupus Clinic registry. Patients enrolled in the cohort received an SLE diagnosis in accordance to the American College of Rheumatology (ACR) criteria confirmed by a lupus specialist (9). Informed written consent was obtained from each patient prior to cohort enrolment. Prospectively collected data include demographics (age, sex, race/ethnicity) and clinical characteristics (SLE disease activity and damage, medications, BMI, and other variables)



1  
2  
3 updated during standardized annual assessments where blood pressure (BP) is measured once,  
4  
5 seated, with an automated cuff.  
6  
7

8 We identified all patients between January 2017 and May 2019 taking medications for  
9  
10 HTN at the time of their last annual visit. We did not include anti-hypertensive agents taken for  
11  
12 other reasons, such as Raynaud's syndrome and proteinuria. The frequency of use for each class  
13  
14 of HTN medication (i.e. angiotensin-converting enzyme inhibitors [ACEI], angiotensin II receptor  
15  
16 blocker [ARB], calcium channel blocker [CCB], beta-blocker, diuretics) was computed.  
17  
18  
19

20 We examined the prevalence of uncontrolled HTN within the cohort according to 2017  
21  
22 HTN guidelines from both Hypertension Canada and the American College of  
23  
24 Cardiology/American Heart Association (ACC/AHA). The 2017 Canadian guidelines recommend a  
25  
26 target systolic arterial BP of <140 mmHg and diastolic arterial BP of <90 mmHg for cardiovascular  
27  
28 disease prevention (10). Conversely, the more stringent ACC/AHA guidelines target a systolic  
29  
30 arterial pressure <130 mmHg, and a diastolic arterial pressure <80 mmHg (11).  
31  
32  
33  
34

35 We analyzed characteristics and demographics of patients with uncontrolled HTN,  
36  
37 defined using the more stringent ACC/AHA guidelines of a BP surpassing 130/80 mmHg despite  
38  
39 the use of antihypertensive medications, as SLE patients are at risk of cardiovascular disease. We  
40  
41 developed multivariate logistic regression analyses including sex, Caucasian race/ethnicity, age,  
42  
43 BMI, SLE disease duration, renal damage, number of current HTN medications, as well as  
44  
45 prednisone and NSAID use. Variables also included the Systemic Lupus Erythematosus Disease  
46  
47 Activity Index 2000 (SLEDAI-2K), a global SLE disease activity index used clinically and in research  
48  
49 which measures 24 clinical variables across all systems (12).  
50  
51  
52  
53  
54  
55  
56  
57  
58  
59  
60

1  
2  
3 We received institutional review board approval through the McGill University Health  
4 Centre (SLE Annual Registry, IRB number 96-060 REC).  
5  
6  
7  
8  
9

## 10 Results

11  
12 During the study period of January 2017 to May 2019, 442 SLE patients from the McGill  
13 University Health Center Lupus Clinic registry were assessed. The mean age at assessment was  
14 48 years old, with a mean age at SLE diagnosis of 31 years. Females comprised 87.8% of the  
15 cohort. Regarding race/ethnicity, 60.4% were Caucasian, 14.5% Black, 13.1% Asian, and the  
16 remainder (12.0%) of other race/ethnicity. The mean BMI was 26.6.  
17  
18  
19  
20  
21  
22  
23  
24

25 Of the 442 patients, 108 (24.4%) were currently taking medications to treat HTN, with 38  
26 patients taking multiple antihypertensives concurrently. Angiotensin receptor blockers were  
27 most commonly prescribed (N=44), followed by CCB (N=40), diuretics (N=33), ACEI (N=25), and  
28 beta-blockers (N=16).  
29  
30  
31  
32  
33  
34

35 Among the 108 patients taking antihypertensive medications, 39.8% (N=43) had a BP  
36 greater than 140/90 mmHg, representing suboptimal control as per Canadian guidelines. More  
37 than two-thirds (66.7%, N=72) of patients on anti-hypertensive medications had BP greater than  
38 130/80 mmHg, representing suboptimal control as per ACC/AHA guidelines (Table 1).  
39  
40  
41  
42  
43  
44

45 Renal damage, defined as a SLICC renal score  $\geq 1$ , was present in 21% (N=15) of Caucasian  
46 patients taking HTN medications, and in 46% (N=17) of patients of another race taking HTN  
47 medications.  
48  
49  
50  
51

52 Multivariate analyses of the 108 patients included sex, race/ethnicity, age at last visit,  
53 BMI, SLE duration, disease activity (SLEDAI-2K), renal damage, number of anti-hypertensive  
54  
55  
56  
57  
58  
59  
60

1  
2  
3 medications, as well as prednisone and NSAID use. Caucasian SLE patients were more likely to  
4  
5 have uncontrolled HTN according to the ACC/AHA definition (odds ratio, OR 2.72, 95% CI 1.12-  
6  
7 6.78). We noted that higher BMI also was associated with uncontrolled HTN (OR 1.08, 95% CI  
8  
9 1.00-1.19). Conversely, patients with renal damage had better BP control (OR 0.39, 95% CI 0.16-  
10  
11 0.97). The effects of the other variables assessed were not clear as the 95% CIs were wide and  
12  
13 included the null value (Table 2).  
14  
15

### 16 Discussion

17  
18  
19  
20 Hypertension is an important contributor to cardiovascular disease, renal damage and  
21  
22 death in SLE patients (3,4). Prior studies have identified risk factors for HTN onset in SLE (13), but  
23  
24 there are less data assessing risk factors for uncontrolled HTN. In our cohort, 24.4% of SLE  
25  
26 patients were taking medications for HTN. Prior studies have estimated that 33% to 48% of SLE  
27  
28 patients take an antihypertensive medication or have a BP measure surpassing 140/90 mmHg  
29  
30 (2,14-15). Importantly, we found a high prevalence of uncontrolled hypertension, with 43 (39.8%)  
31  
32 of the 108 patients taking antihypertensive medications having uncontrolled BP according to the  
33  
34 Canadian guidelines, and 72 patients (66.7%) according to ACC/AHA guidelines. This finding  
35  
36 reinforces the need to examine risk factors contributing to uncontrolled BP in SLE, in order to  
37  
38 better manage our patients.  
39  
40  
41  
42  
43

44  
45 Among the 108 patients from the cohort currently taking anti-hypertensive medications,  
46  
47 the most commonly used medication class were ARBs, followed by CCB, diuretics, ACEI, and beta-  
48  
49 blockers. There are no specific guidelines for the first-line antihypertensive medication to use in  
50  
51 SLE, however ARB and ACEI have been recommended due to their additional beneficial effect in  
52  
53 renal and cardiovascular disease (16,17). The next most commonly used antihypertensive agent  
54  
55  
56  
57  
58  
59  
60

1  
2  
3 in our cohort, CCB, is useful in patients with Raynaud's syndrome and/or pulmonary artery  
4 hypertension, important clinical manifestations of SLE (16). Diuretics and beta-blockers have not  
5  
6 been widely studied in hypertensive SLE patients. While they can be efficacious, they may cause  
7  
8 photosensitivity, a common comorbidity in SLE, with early reports suggesting they may trigger  
9  
10 cutaneous lupus (18). Beta-blockers may also worsen Raynaud's phenomenon, which is prevalent  
11  
12 in SLE. Of note, many of our patients received combination HTN therapies.  
13  
14  
15  
16  
17

18 In our cohort, Caucasians were more likely to have uncontrolled HTN. This finding differs  
19  
20 from previous studies in SLE, which found that race/ethnicity groups traditionally at high risk of  
21  
22 suboptimal BP control, such as black patients, were indeed more likely to have resistant HTN (5).  
23  
24 However, Caucasian race has not always been associated with good HTN control in the general  
25  
26 American population (19). The observed associations between Caucasian race/ethnicity and  
27  
28 uncontrolled HTN in our SLE sample may suggest that non-Caucasians were aggressively treated,  
29  
30 perhaps because of the knowledge that this demographic is susceptible to poor outcomes. In  
31  
32 addition, renal damage in our cohort was negatively associated with uncontrolled HTN (OR 0.39  
33  
34 95% CI 0.16-0.97), which is reassuring as controlling BP is key to preventing further renal damage.  
35  
36 Although our analysis has adjusted for renal disease, this result may contribute to why Caucasian  
37  
38 patients, with less renal damage than non-Caucasians, had poorer blood pressure control. We  
39  
40 noted that patients with higher BMI were more likely to have poor BP control (OR 1.08, 95% CI  
41  
42 1.00-1.19). Risk factors for uncontrolled HTN were analyzed according to ACC/AHA guidelines, as  
43  
44 they recommend a lower blood pressure target, which could be beneficial to SLE patients given  
45  
46 the increased risk of cardiovascular disease. Of note, current published HTN guidelines do not  
47  
48  
49  
50  
51  
52  
53  
54  
55  
56  
57  
58  
59  
60

1  
2  
3 specifically provide a target for SLE patients, therefore studies aiming to define a target are  
4  
5 needed.  
6

7  
8 We could not draw definitive conclusions on the other variables assessed as the 95% CIs  
9  
10 were imprecise and included the null value. Further work using a longitudinal repeated  
11  
12 measure design is needed to explore the effects of those variables, in addition to HTN  
13  
14 treatment, disease activity, disease damage (e.g., renal failure associated with SLE), and  
15  
16 concomitant medications (e.g. steroids, NSAIDs) on HTN in SLE.  
17

18  
19  
20 Potential limitations to our study should be noted. Our study was cross-sectional, and the  
21  
22 blood pressure of cohort patients was taken as a single measurement at annual visits. Also, we  
23  
24 studied patients from a tertiary care centre within a specialized clinic, and within the setting of  
25  
26 universal health care. The results do suggest that good BP control is possible in high-risk SLE  
27  
28 patients including non-Caucasians and those with renal damage, though this may be more  
29  
30 difficult in other settings (such as non-universal health care, where problems with health care  
31  
32 access and patient adherence may create difficulties).  
33  
34  
35

36  
37 In summary, our cross-sectional analysis showed that 24.4% of SLE patients were  
38  
39 currently taking medications to treat HTN, and that over one-third required two or more  
40  
41 medications concurrently. Angiotensin receptor blockers, ACEI, and CCB were common  
42  
43 antihypertensive choices, and diuretics were often used despite concerns in the literature  
44  
45 regarding photosensitivity and lupus rash. Among the 108 patients taking antihypertensive  
46  
47 medications, 39.8% had suboptimal control as per Canadian guidelines and 66.7% had suboptimal  
48  
49 control as per ACC/AHA guidelines. In our cohort, Caucasian SLE patients were more likely to have  
50  
51 uncontrolled HTN, and we found a negative association between renal damage and our outcome.  
52  
53  
54  
55  
56  
57  
58  
59

1  
2  
3 The results suggest that good BP control is possible in high-risk SLE patients including non-  
4  
5 Caucasians and those with renal damage, though this may be more difficult in other settings (such  
6  
7 as non-universal health care and suboptimal care access).  
8  
9  
10  
11  
12  
13  
14  
15  
16  
17  
18  
19  
20  
21  
22  
23  
24  
25  
26  
27  
28  
29  
30  
31  
32  
33  
34  
35  
36  
37  
38  
39  
40  
41  
42  
43  
44  
45  
46  
47  
48  
49  
50  
51  
52  
53  
54  
55  
56  
57  
58  
59  
60

For peer review only

## References

- (1) Statistics Canada. Systematic lupus erythematosus. Available: <https://www150.statcan.gc.ca/n1/pub/82-619-m/2006003/4053548-eng.htm> [Accessed 20 May 2020].
- (2) Bruce IN, Urowitz MB, Gladman DD, et al. Risk factors for coronary heart disease in women with systemic lupus erythematosus. The Toronto Risk Factor Study. *Arthritis Rheum* 2003;48:3159–67. doi:10.1002/art.11296.
- (3) Nikpour M, Urowitz MB, Ibanez D, et al. Importance of cumulative exposure to elevated cholesterol and blood pressure in development of atherosclerotic coronary artery disease in systemic lupus erythematosus: a prospective proof-of-concept cohort study. *Arthritis Res Ther* 13, R156 (2011). doi:10.1186/ar3473.
- (4) Mok CC, Kwok RC, Yip PS. Effect of renal disease on the standardized mortality ratio and life expectancy of patients with systemic lupus erythematosus. *Arthritis Rheum*. 2013;65(8):2154-2160. doi:10.1002/art.38006.
- (5) Gandelman JS, Khan OA, Shuey MM, et al. Increased Incidence of Resistant Hypertension in Patients with Systemic Lupus Erythematosus: A Retrospective Cohort Study. *Arthritis Care Res (Hoboken)*. 2019 Mar 15;. doi:10.1002/acr.23880. [Epub ahead of print] PubMed PMID: 30875459.
- (6) Keeling SO, Vandermeer B, Medina J, et al. (2018). Measuring Disease Activity and Damage with Validated Metrics: A Systematic Review on Mortality and Damage in Systemic Lupus Erythematosus. *The Journal of Rheumatology*, 45(10), 1448–1461. doi:10.3899/jrheum.171310.
- (7) Urowitz MB, Gladman D, Ibañez D, et al. Atherosclerotic vascular events in a multinational inception cohort of systemic lupus erythematosus. *Arthritis Care Res (Hoboken)*. 2010 Jun;62(6):881-7. doi:10.1002/acr.20122.
- (8) Patterson SL, Schmajuk G, Jafri K, et al. Obesity is Independently Associated With Worse Patient-Reported Outcomes in Women with Systemic Lupus Erythematosus. *Arthritis Care Res (Hoboken)*. 2019;71(1):126-133. doi:10.1002/acr.23576.
- (9) Hochberg MC. Updating the American College of Rheumatology revised criteria for the classification of systemic lupus erythematosus. *Arthritis Rheum* 1997;40:1725. doi:10.1002/art.1780400928.
- (10) Leung AA, Daskalopoulou SS, Dasgupta K, et al. Hypertension Canada's 2017 Guidelines for Diagnosis, Risk Assessment, Prevention, and Treatment of Hypertension in Adults [published correction appears in *Can J Cardiol*. 2017 Dec;33(12):1733-1734]. *Can J Cardiol*. 2017;33(5):557-576. doi:10.1016/j.cjca.2017.03.005.
- (11) Whelton PK, et al., 2017 ACC/AHA/AAPA/ABC/ACPM/AGS/APhA/ASH/ASPC/NMA/PCNA Guideline for the Prevention, Detection, Evaluation, and Management of High Blood Pressure in Adults: A Report of the American College of Cardiology/American Heart Association Task Force on

1  
2  
3 Clinical Practice Guidelines. *J Am Coll Cardiol*, 2018. 71(19): p. e127- e248.  
4 doi:10.1161/HYP.0000000000000065.  
5

- 6 (12) Gladman DD, Ibañez D, Urowitz MB. Systemic lupus erythematosus disease activity index 2000. *J*  
7 *Rheumatol*. 2002 Feb;29(2):288-91.  
8  
9 (13) Chaiamnuay S, Bertoli AM, Roseman JM, et al. African–American and Hispanic ethnicities, renal  
10 involvement and obesity predispose to hypertension in systemic lupus erythematosus: results  
11 from LUMINA, a multiethnic cohort (LUMINAXLV) *Annals of the Rheumatic Diseases* 2007;66:618-  
12 622. doi:10.1136/ard.2006.059311.  
13  
14 (14) Petri M. Detection of coronary artery disease and the role of traditional risk factors in the  
15 Hopkins Lupus Cohort. *Lupus*. 2000;9(3):170-175. doi:10.1191/096120300678828226.  
16  
17 (15) Asanuma Y, Oeser A, Shintani AK, et al. Premature coronary-artery atherosclerosis in systemic  
18 lupus erythematosus. *N Engl J Med*. 2003;349(25):2407-2415. doi:10.1056/NEJMoa035611.  
19  
20 (16) Tselios K, Koumaras C, Urowitz M, et al. (2013). Do current arterial hypertension treatment  
21 guidelines apply to systemic lupus erythematosus patients? A critical appraisal. *Seminars in*  
22 *arthritis and rheumatism*. doi:43.10.1016/j.semarthrit.2013.07.007.  
23  
24 (17) Tse K C, Li FK, Tang S, et al. (2005). Angiotensin inhibition or blockade for the treatment of  
25 patients with quiescent lupus nephritis and persistent proteinuria. *Lupus*, 14(12), 947–952.  
26 doi:10.1191/0961203305lu2249oa.  
27  
28 (18) Sontheimer RD, Henderson CL, Grau RH. Drug-induced subacute cutaneous lupus erythematosus:  
29 a paradigm for bedside-to-bench patient-oriented translational clinical investigation. *Arch*  
30 *Dermatol Res* 301, 65 (2009). doi:10.1007/s00403-008-0890-x.  
31  
32 (19) Knight EL, Bohn RL, Wang PS, et al. Predictors of uncontrolled hypertension in ambulatory  
33 patients. *Hypertension*. 2001;38(4):809-814. doi:10.1161/hy0901.091681.  
34  
35  
36  
37  
38  
39  
40  
41  
42  
43  
44  
45  
46  
47  
48  
49  
50  
51  
52  
53  
54  
55  
56  
57  
58  
59  
60



## Tables

Table 1. Characteristics of the 108 SLE patients treated for HTN, controlled vs. uncontrolled HTN (>130/80 mmHg).

| Variables                              | All patients<br>N=108 | Controlled,<br>N= 36 | Uncontrolled,<br>N=72 | Differences<br>(95% CI) <sup>a</sup> |
|----------------------------------------|-----------------------|----------------------|-----------------------|--------------------------------------|
| Male sex, N (%)                        | 18 (16.7)             | 6 (16.7)             | 12 (16.7)             | <b>&lt;0.01 (-0.17, 0.14)</b>        |
| Caucasian<br>race/ethnicity, N (%)     | 71 (65.7)             | 19 (52.8)            | 52 (72.2)             | <b>0.19 (0.00, 0.38)</b>             |
| Age at last visit > 65<br>years, N (%) | 45 (41.7)             | 12 (33.3)            | 33 (45.8)             | <b>0.12 (-0.07, 0.30)</b>            |
| Mean body mass index,<br>BMI (SD)      | 26.6 (5.2)            | 25.6 (5.1)           | 27.1 (5.2)            | <b>2.04 (-0.42, 4.17)</b>            |
| Mean SLE duration,<br>years (SD)       | 23.5 (14.2)           | 23.1 (15.2)          | 23.7 (13.8)           | <b>0.94 (-5.01, 6.96)</b>            |
| SLEDAI-2K ≥4, N (%)                    | 48 (44.4)             | 18 (50.0)            | 30 (41.7)             | <b>0.08 (-0.11, 0.27)</b>            |
| Renal damage ≥1, N<br>(%)              | 32 (29.6)             | 16 (44.4)            | 16 (22.2)             | <b>0.22 (0.04, 0.40)</b>             |
| Prednisone use, N (%)                  | 16 (14.8)             | 5 (13.9)             | 11 (15.3)             | <b>0.01 (-0.15, 0.14)</b>            |
| NSAIDs use, N (%)                      | 5 (4.6)               | 1 (2.8)              | 4 (5.6)               | <b>0.03 (-0.09, 0.11)</b>            |
| Using >1 BP<br>medication, N (%)       | 38 (35.2)             | 10 (27.8)            | 28 (38.9)             | <b>0.11 (-0.08, 0.28)</b>            |
| Mean Systolic BP, (SD)                 | 134.2 (18.2)          | 116.0 (9.4)          | 143.2 (14.3)          | <b>26.0 (21.0, 31.0)</b>             |
| Mean Diastolic BP,<br>(SD)             | <b>79.9 (10.8)</b>    | <b>70.7 (6.3)</b>    | <b>84.6 (9.5)</b>     | <b>13.0 (10.0, 16.0)</b>             |

<sup>a</sup> The difference in proportions between groups (Controlled (n = 36) and Uncontrolled (n = 72) as well as their 95% confidence intervals. This analysis was performed using the Newcombe-Wilson score method. For continuous variables. For continuous variables (body mass index, SLE duration, systolic BP and diastolic BP), we used the Wilcoxon test to determine the confidence intervals for the difference.

Table 2. Logistic regression of SLE patients treated for HTN: Odds Ratios (OR) for uncontrolled HTN (>130/80 mmHg).

| VARIABLES                    | UNADJUSTED OR<br>(95% CI) | ADJUSTED OR<br>(95% CI) <sup>A</sup> |
|------------------------------|---------------------------|--------------------------------------|
| MALE SEX                     | 1.00 (0.35-3.11)          | 1.27 (0.42-4.24)                     |
| CAUCASIAN RACE/ETHNICITY     | <b>2.33 (1.01-5.40)</b>   | <b>2.72 (1.12-6.78)</b>              |
| AGE AT LAST VISIT > 65 YEARS | 1.69 (0.74-3.99)          | 1.68 (0.71-4.08)                     |
| BODY MASS INDEX              | 1.06 (0.98-1.15)          | <b>1.08 (1.00-1.19)</b>              |
| SLE DURATION (YEARS)         | 1.00 (0.97-1.03)          | 0.99 (0.96-1.02)                     |
| SLEDAI-2K $\geq$ 4           | 0.71 (0.32-1.60)          | 0.77 (0.33-1.76)                     |
| RENAL DAMAGE $\geq$ 1        | <b>0.36 (0.15-0.84)</b>   | <b>0.39 (0.16-0.97)</b>              |
| USING MORE >1 BP MEDICATION  | 1.65 (0.71-4.08)          | 1.54 (0.63-3.96)                     |
| PREDNISONE                   | 1.12 (0.37-3.81)          | 1.17 (0.38-4.14)                     |
| NSAIDS                       | 2.06 (0.29-41.10)         | 1.99 (0.26-41.0)                     |

<sup>a</sup> Adjusted for: age at last visit, sex and race/ethnicity.

**STROBE 2007 (v4) Statement—Checklist of items that should be included in reports of *cohort studies***

| Section/Topic                | Item # | Recommendation                                                                                                                                                                       | Reported on page # |
|------------------------------|--------|--------------------------------------------------------------------------------------------------------------------------------------------------------------------------------------|--------------------|
| <b>Title and abstract</b>    | 1      | (a) Indicate the study's design with a commonly used term in the title or the abstract                                                                                               | 3                  |
|                              |        | (b) Provide in the abstract an informative and balanced summary of what was done and what was found                                                                                  | 3                  |
| <b>Introduction</b>          |        |                                                                                                                                                                                      |                    |
| Background/rationale         | 2      | Explain the scientific background and rationale for the investigation being reported                                                                                                 | 5                  |
| Objectives                   | 3      | State specific objectives, including any prespecified hypotheses                                                                                                                     | 5                  |
| <b>Methods</b>               |        |                                                                                                                                                                                      |                    |
| Study design                 | 4      | Present key elements of study design early in the paper                                                                                                                              | 5                  |
| Setting                      | 5      | Describe the setting, locations, and relevant dates, including periods of recruitment, exposure, follow-up, and data collection                                                      | 5, 6               |
| Participants                 | 6      | (a) Give the eligibility criteria, and the sources and methods of selection of participants. Describe methods of follow-up                                                           | 6                  |
|                              |        | (b) For matched studies, give matching criteria and number of exposed and unexposed                                                                                                  | n/a                |
| Variables                    | 7      | Clearly define all outcomes, exposures, predictors, potential confounders, and effect modifiers. Give diagnostic criteria, if applicable                                             | 5, 6               |
| Data sources/<br>measurement | 8*     | For each variable of interest, give sources of data and details of methods of assessment (measurement). Describe comparability of assessment methods if there is more than one group | 5                  |
| Bias                         | 9      | Describe any efforts to address potential sources of bias                                                                                                                            | 5, 6               |
| Study size                   | 10     | Explain how the study size was arrived at                                                                                                                                            | 7                  |
| Quantitative variables       | 11     | Explain how quantitative variables were handled in the analyses. If applicable, describe which groupings were chosen and why                                                         | 6                  |
| Statistical methods          | 12     | (a) Describe all statistical methods, including those used to control for confounding                                                                                                | 6                  |
|                              |        | (b) Describe any methods used to examine subgroups and interactions                                                                                                                  | 6                  |
|                              |        | (c) Explain how missing data were addressed                                                                                                                                          | n/a                |
|                              |        | (d) If applicable, explain how loss to follow-up was addressed                                                                                                                       | n/a                |
|                              |        | (e) Describe any sensitivity analyses                                                                                                                                                | n/a                |
| <b>Results</b>               |        |                                                                                                                                                                                      |                    |

|                          |     |                                                                                                                                                                                                              |     |
|--------------------------|-----|--------------------------------------------------------------------------------------------------------------------------------------------------------------------------------------------------------------|-----|
| Participants             | 13* | (a) Report numbers of individuals at each stage of study—eg numbers potentially eligible, examined for eligibility, confirmed eligible, included in the study, completing follow-up, and analysed            | 7   |
|                          |     | (b) Give reasons for non-participation at each stage                                                                                                                                                         | n/a |
|                          |     | (c) Consider use of a flow diagram                                                                                                                                                                           | n/a |
| Descriptive data         | 14* | (a) Give characteristics of study participants (eg demographic, clinical, social) and information on exposures and potential confounders                                                                     | 7   |
|                          |     | (b) Indicate number of participants with missing data for each variable of interest                                                                                                                          | n/a |
|                          |     | (c) Summarise follow-up time (eg, average and total amount)                                                                                                                                                  | 7   |
| Outcome data             | 15* | Report numbers of outcome events or summary measures over time                                                                                                                                               | 7   |
| Main results             | 16  | (a) Give unadjusted estimates and, if applicable, confounder-adjusted estimates and their precision (eg, 95% confidence interval). Make clear which confounders were adjusted for and why they were included | 6   |
|                          |     | (b) Report category boundaries when continuous variables were categorized                                                                                                                                    | 7   |
|                          |     | (c) If relevant, consider translating estimates of relative risk into absolute risk for a meaningful time period                                                                                             | n/a |
| Other analyses           | 17  | Report other analyses done—eg analyses of subgroups and interactions, and sensitivity analyses                                                                                                               | n/a |
| <b>Discussion</b>        |     |                                                                                                                                                                                                              |     |
| Key results              | 18  | Summarise key results with reference to study objectives                                                                                                                                                     | 8   |
| <b>Limitations</b>       |     |                                                                                                                                                                                                              |     |
| Interpretation           | 20  | Give a cautious overall interpretation of results considering objectives, limitations, multiplicity of analyses, results from similar studies, and other relevant evidence                                   | 8,9 |
| Generalisability         | 21  | Discuss the generalisability (external validity) of the study results                                                                                                                                        | 10  |
| <b>Other information</b> |     |                                                                                                                                                                                                              |     |
| Funding                  | 22  | Give the source of funding and the role of the funders for the present study and, if applicable, for the original study on which the present article is based                                                | 1   |

\*Give information separately for cases and controls in case-control studies and, if applicable, for exposed and unexposed groups in cohort and cross-sectional studies.

**Note:** An Explanation and Elaboration article discusses each checklist item and gives methodological background and published examples of transparent reporting. The STROBE checklist is best used in conjunction with this article (freely available on the Web sites of PLoS Medicine at <http://www.plosmedicine.org/>, Annals of Internal Medicine at <http://www.annals.org/>, and Epidemiology at <http://www.epidem.com/>). Information on the STROBE Initiative is available at [www.strobe-statement.org](http://www.strobe-statement.org).

# BMJ Open

## Treatment Patterns and Control of Hypertension in Systemic Lupus Erythematosus (SLE): A Cross-Sectional Study

|                                 |                                                                                                                                                                                                                                                                                                                                                                                                                                                                                                                                             |
|---------------------------------|---------------------------------------------------------------------------------------------------------------------------------------------------------------------------------------------------------------------------------------------------------------------------------------------------------------------------------------------------------------------------------------------------------------------------------------------------------------------------------------------------------------------------------------------|
| Journal:                        | <i>BMJ Open</i>                                                                                                                                                                                                                                                                                                                                                                                                                                                                                                                             |
| Manuscript ID                   | bmjopen-2020-048384.R1                                                                                                                                                                                                                                                                                                                                                                                                                                                                                                                      |
| Article Type:                   | Original research                                                                                                                                                                                                                                                                                                                                                                                                                                                                                                                           |
| Date Submitted by the Author:   | 20-Aug-2021                                                                                                                                                                                                                                                                                                                                                                                                                                                                                                                                 |
| Complete List of Authors:       | Li Liu, Jia; McGill University<br>Pineau, Christian; McGill University Health Centre, Rheumatology<br>Grenier, Louis-Pierre; McGill University Health Centre<br>Vinet, Evelyne; McGill University Health Centre, Rheumatology<br>Kalache, Fares; McGill University Health Centre<br>Lukusa, Luck; Research Institute of the McGill University Health Centre, Centre for Outcomes Research & Evaluation (CORE)<br>Bernatsky, Sasha; Research Institute of the McGill University Health Centre; McGill University Health Centre, Rheumatology |
| <b>Primary Subject Heading</b>: | Rheumatology                                                                                                                                                                                                                                                                                                                                                                                                                                                                                                                                |
| Secondary Subject Heading:      | Epidemiology                                                                                                                                                                                                                                                                                                                                                                                                                                                                                                                                |
| Keywords:                       | EPIDEMIOLOGY, RHEUMATOLOGY, Hypertension < CARDIOLOGY, Protocols & guidelines < HEALTH SERVICES ADMINISTRATION & MANAGEMENT                                                                                                                                                                                                                                                                                                                                                                                                                 |
|                                 |                                                                                                                                                                                                                                                                                                                                                                                                                                                                                                                                             |

SCHOLARONE™  
Manuscripts



I, the Submitting Author has the right to grant and does grant on behalf of all authors of the Work (as defined in the below author licence), an exclusive licence and/or a non-exclusive licence for contributions from authors who are: i) UK Crown employees; ii) where BMJ has agreed a CC-BY licence shall apply, and/or iii) in accordance with the terms applicable for US Federal Government officers or employees acting as part of their official duties; on a worldwide, perpetual, irrevocable, royalty-free basis to BMJ Publishing Group Ltd ("BMJ") its licensees and where the relevant Journal is co-owned by BMJ to the co-owners of the Journal, to publish the Work in this journal and any other BMJ products and to exploit all rights, as set out in our [licence](#).

The Submitting Author accepts and understands that any supply made under these terms is made by BMJ to the Submitting Author unless you are acting as an employee on behalf of your employer or a postgraduate student of an affiliated institution which is paying any applicable article publishing charge ("APC") for Open Access articles. Where the Submitting Author wishes to make the Work available on an Open Access basis (and intends to pay the relevant APC), the terms of reuse of such Open Access shall be governed by a Creative Commons licence – details of these licences and which [Creative Commons](#) licence will apply to this Work are set out in our licence referred to above.

Other than as permitted in any relevant BMJ Author's Self Archiving Policies, I confirm this Work has not been accepted for publication elsewhere, is not being considered for publication elsewhere and does not duplicate material already published. I confirm all authors consent to publication of this Work and authorise the granting of this licence.

**Full title of manuscript:**

Treatment Patterns and Control of Hypertension in Systemic Lupus Erythematosus (SLE): A Cross-Sectional Study

**Complete given names and surnames of all authors with ORCID ID if any:**

Jia Li Liu<sup>1</sup>

Christian A. Pineau<sup>1,2</sup> (ORCID 0000-0002-4966-1526)

Louis-Pierre Grenier<sup>2</sup>

Evelyne Vinet<sup>1,2</sup> (ORCID 0000-0001-7727-5879)

Fares Kalache<sup>2</sup>

Luck Lukusa<sup>2</sup>

Sasha Bernatsky<sup>1,2</sup> (ORCID 0000-0002-9515-2802)

**Key Indexing Terms:**

systemic lupus erythematosus, hypertension, antihypertensive agents, guideline, risk factors

**Name of department(s) and institution(s) to which the work should be attributed:**

<sup>1</sup> McGill University, Montreal <sup>2</sup> McGill University Health Centre, Montreal

**The source(s) of support in the form of grants or industrial support:**

The McGill University Health Center Lupus Clinic research activities are funded by the Singer Family Fund for Lupus Research. Ms. Liu is the recipient of a research-based summer studentship from the Canadian Rheumatology Association, as well as a research bursary from the McGill Faculty of Medicine.

**Conflict of interest:**

The authors declare no conflict of interest.

**Initials, surnames, appointments, and highest academic degrees of all authors (e.g., MD, PhD):**

J. L. Liu, MD Candidate

C. A. Pineau, MD

L. Grenier, MD

E. Vinet, MD, PhD

F. Kalache, MD

L. Lukusa, MSc

S. Bernatsky, MD, PhD

**Contributorship:**

JLL contributed to the design, interpretation of the data and writing of the manuscript. CAP, LPG, EV FK contributed to the collection of cohort data, design, interpretation of the data and writing of the manuscript. LL contributed to the design, analysis, and interpretation of the data. SB contributed to the collection of cohort data, conception, design, interpretation of the data and writing of the manuscript. All authors read and approved the final version of the manuscript.

**Acknowledgements:** None

**Data sharing statement:** All data relevant to the study are included in the article or uploaded as supplementary information.

**Patient and Public Involvement statement:** Patients and/or the public were not involved in the design, or conduct, or reporting, or dissemination plans of this research.

**Name, address, and e-mail of author responsible for correspondence:**

Dr. S. Bernatsky, Research Institute of the McGill University Health Centre, Division of Clinical Epidemiology, 5252 Boul. de Maisonneuve Ouest, 3F.51, Montreal, Quebec H4A 3S5, Canada. E-mail: [sasha.bernatsky@mcgill.ca](mailto:sasha.bernatsky@mcgill.ca)

**Short running head (maximum of 4 words):**

SLE blood pressure control



1  
2  
3  
4  
5 Objective: Hypertension (HTN) is common in Systemic Lupus Erythematosus (SLE), representing  
6 a key risk factor for cardiovascular and renal disease. We described HTN treatment patterns in  
7 SLE, evaluated uncontrolled HTN according to Canadian and American guidelines, and identified  
8 factors associated with uncontrolled HTN.  
9  
10  
11  
12

13  
14 Methods: We performed a cross-sectional study, identifying all McGill Lupus Clinic registry  
15 patients with an annual visit between January 2017 and May 2019 who were taking HTN  
16 medications. We excluded those taking medications only for another indication (e.g.  
17 Raynaud's). We determined the frequency of uncontrolled HTN according to Canadian and  
18 American College of Cardiology (ACC)/American Heart Association (AHA) guidelines.  
19 Multivariate logistic regression (adjusted for age, sex, and race/ethnicity) evaluated if  
20 uncontrolled HTN was more common with high body mass index (BMI), longer SLE duration,  
21 high disease activity, renal damage, multiple concomitant antihypertensives, prednisone and  
22 Nonsteroidal anti-inflammatory drugs (NSAIDs).  
23  
24  
25  
26  
27  
28  
29  
30  
31

32 Results: Of 442 SLE patients, 108 were taking medications to treat HTN, and 38 took multiple  
33 medications concurrently. Angiotensin-receptor blockers were most common, followed by  
34 calcium-channel blockers, diuretics, angiotensin-converting enzyme inhibitors, and beta-  
35 blockers. Among the 108 patients, 39.8% (n=43) had blood pressure >140/90 mmHg, while  
36 66.7% (n=72) had blood pressure >130/80 mmHg. In multivariate analyses, uncontrolled HTN  
37 (>130/80 mmHg) was more likely in Caucasians (OR 2.72, 95% CI 1.12-6.78) and patients with  
38 higher BMI (OR 1.08, 95% CI 1.00-1.19). Patients with renal damage had better HTN control (OR  
39 0.39, 95% CI 0.16-0.97). We could not draw definitive conclusions regarding other variables.  
40  
41  
42  
43  
44  
45  
46  
47  
48

49 Conclusion: Caucasians and patients with higher BMI had more uncontrolled HTN. The negative  
50 association with renal damage is reassuring, as controlled BP is key for renal protection.  
51  
52  
53  
54  
55  
56  
57  
58  
59  
60

**Strengths and limitations of this study**

- -Hypertension is a common comorbidity of SLE, therefore understanding and addressing risk factors to suboptimal control is crucial to avoid future cardiovascular and renal consequences.
- Our study was performed on a large cohort of SLE patients who receive annual standardized evaluations of clinical characteristics.
- Results were computed using multivariate logistic regression analyses adjusted for age, sex, and race/ethnicity.
- The cross-sectional nature of our study may only allow for identification of associations.  
- Our study was performed in a specialized clinic within a tertiary hospital.

## Introduction

In systemic lupus erythematosus (SLE), hypertension (HTN) is common (1,2) and represents a major, correctable risk factor for cardiovascular disease and renal damage, two frequent adverse outcomes in SLE (3,4). Certain SLE patient subgroups have traditionally had worse disease outcome, including older patients, males, non-Caucasians, those with active disease, high body mass index (BMI), and renal damage (5-8). To our knowledge, data on risk factors leading to uncontrolled HTN in SLE patients remain scarce. We conducted an assessment of the McGill University Health Center Lupus Clinic registry to describe HTN treatment patterns, evaluate the prevalence of uncontrolled HTN according to Hypertension Canada and the more stringent American College of Cardiology/American Heart Association (ACC/AHA) guidelines for HTN, and assess uncontrolled HTN in the traditionally vulnerable groups of males, non-Caucasians, older SLE patients, as well as patients with high BMI, active SLE, or renal damage. The effects of prednisone and NSAID use on uncontrolled HTN were also evaluated.

## Materials and Methods

We conducted a cross-sectional assessment of data extracted from the McGill University Health Center Lupus Clinic registry. Patients enrolled in the cohort received an SLE diagnosis in accordance to the American College of Rheumatology (ACR) criteria confirmed by a lupus specialist (9). Informed written consent was obtained from each patient prior to cohort enrolment. Prospectively collected data include demographics (age, sex, race/ethnicity) and clinical characteristics (SLE disease activity and damage, medications, BMI, and other variables)

1  
2  
3 updated during standardized annual assessments where blood pressure (BP) is measured once,  
4  
5 seated, with an automated cuff.  
6  
7

8 We identified all patients between January 2017 and May 2019 taking medications for  
9  
10 HTN at the time of their last annual visit. We did not include anti-hypertensive agents taken for  
11  
12 other reasons, such as Raynaud's syndrome and proteinuria. The frequency of use for each class  
13  
14 of HTN medication (i.e. angiotensin-converting enzyme inhibitors [ACEI], angiotensin II receptor  
15  
16 blocker [ARB], calcium channel blocker [CCB], beta-blocker, diuretics) was computed.  
17  
18  
19

20 We examined the prevalence of uncontrolled HTN within the cohort according to 2017  
21  
22 HTN guidelines from both Hypertension Canada and the American College of  
23  
24 Cardiology/American Heart Association (ACC/AHA). The 2017 Canadian guidelines recommend a  
25  
26 target systolic arterial BP of <140 mmHg and diastolic arterial BP of <90 mmHg for cardiovascular  
27  
28 disease prevention (10). Conversely, the more stringent ACC/AHA guidelines target a systolic  
29  
30 arterial pressure <130 mmHg, and a diastolic arterial pressure <80 mmHg (11).  
31  
32  
33  
34  
35

36 We analyzed characteristics and demographics of patients with uncontrolled HTN,  
37  
38 defined using the more stringent ACC/AHA guidelines of a BP surpassing 130/80 mmHg despite  
39  
40 the use of antihypertensive medications, as SLE patients are at risk of cardiovascular disease. We  
41  
42 developed multivariate logistic regression analyses including sex, Caucasian race/ethnicity, age,  
43  
44 BMI, SLE disease duration, renal damage, number of current HTN medications, as well as  
45  
46 prednisone and NSAID use. Variables also included the Systemic Lupus Erythematosus Disease  
47  
48 Activity Index 2000 (SLEDAI-2K), a global SLE disease activity index used clinically and in research  
49  
50 which measures 24 clinical variables across all systems (12). The analysis was carried out using  
51  
52  
53  
54  
55  
56  
57  
58  
59  
60

1  
2  
3 the Generalized linear model (GLM) function of the *R* software. The overall regression diagnosis  
4  
5 has been validated by the ROC curve and the Hosmer-Lemeshow test.  
6  
7

8 We received institutional review board approval through the McGill University Health  
9  
10 Centre (SLE Annual Registry, IRB number 96-060 REC).  
11  
12  
13

## 14 15 16 Results

17  
18 During the study period of January 2017 to May 2019, 442 SLE patients from the McGill  
19  
20 University Health Center Lupus Clinic registry were assessed. The mean age at assessment was  
21  
22 48 years old, with a mean age at SLE diagnosis of 31 years. Females comprised 87.8% of the  
23  
24 cohort. Regarding race/ethnicity, 60.4% were Caucasian, 14.5% Black, 13.1% Asian, and the  
25  
26 remainder (12.0%) of other race/ethnicity. The mean BMI was 26.6.  
27  
28  
29

30 Of the 442 patients, 108 (24.4%) were currently taking medications to treat HTN, with 38  
31  
32 patients taking multiple antihypertensives concurrently. Angiotensin receptor blockers were  
33  
34 most commonly prescribed (N=44), followed by CCB (N=40), diuretics (N=33), ACEI (N=25), and  
35  
36 beta-blockers (N=16).  
37  
38  
39

40 Among the 108 patients taking antihypertensive medications, 39.8% (N=43) had a BP  
41  
42 greater than 140/90 mmHg, representing suboptimal control as per Canadian guidelines. More  
43  
44 than two-thirds (66.7%, N=72) of patients on anti-hypertensive medications had BP greater than  
45  
46 130/80 mmHg, representing suboptimal control as per ACC/AHA guidelines (Table 1).  
47  
48  
49

50 Renal damage, defined as a SLICC renal score  $\geq 1$ , was present in 21% (N=15) of Caucasian  
51  
52 patients taking HTN medications, and in 46% (N=17) of patients of another race taking HTN  
53  
54 medications.  
55  
56  
57  
58  
59  
60

1  
2  
3 Multivariate analyses of the 108 patients included sex, race/ethnicity, age at last visit,  
4  
5 BMI, SLE duration, disease activity (SLEDAI-2K), renal damage, number of anti-hypertensive  
6  
7 medications, as well as prednisone and NSAID use. Caucasian SLE patients were more likely to  
8  
9 have uncontrolled HTN according to the ACC/AHA definition (odds ratio, OR 2.72, 95% CI 1.12-  
10  
11 6.78). We noted that higher BMI also was associated with uncontrolled HTN (OR 1.08, 95% CI  
12  
13 1.00-1.19). Conversely, patients with renal damage had better BP control (OR 0.39, 95% CI 0.16-  
14  
15 0.97). The effects of the other variables assessed were not clear as the 95% CIs were wide and  
16  
17 included the null value (Table 2).  
18  
19  
20  
21

## 22 Discussion

23  
24  
25 Hypertension is an important contributor to cardiovascular disease, renal damage and  
26  
27 death in SLE patients (3,4). Prior studies have identified risk factors for HTN onset in SLE (13), but  
28  
29 there are less data assessing risk factors for uncontrolled HTN. In our cohort, 24.4% of SLE  
30  
31 patients were taking medications for HTN. Prior studies have estimated that 33% to 48% of SLE  
32  
33 patients take an antihypertensive medication or have a BP measure surpassing 140/90 mmHg  
34  
35 (2,14-15). Importantly, we found a high prevalence of uncontrolled hypertension, with 43 (39.8%)  
36  
37 of the 108 patients taking antihypertensive medications having uncontrolled BP according to the  
38  
39 Canadian guidelines, and 72 patients (66.7%) according to ACC/AHA guidelines. This finding  
40  
41 reinforces the need to examine risk factors contributing to uncontrolled BP in SLE, in order to  
42  
43 better manage our patients.  
44  
45  
46  
47  
48

49  
50 Among the 108 patients from the cohort currently taking anti-hypertensive medications,  
51  
52 the most commonly used medication class were ARBs, followed by CCB, diuretics, ACEI, and beta-  
53  
54 blockers. There are no specific guidelines for the first-line antihypertensive medication to use in  
55  
56  
57  
58  
59

1  
2  
3 SLE, however ARB and ACEI have been recommended due to their additional beneficial effect in  
4  
5 renal and cardiovascular disease (16,17). The next most commonly used antihypertensive agent  
6  
7 in our cohort, CCB, is useful in patients with Raynaud's syndrome and/or pulmonary artery  
8  
9 hypertension, important clinical manifestations of SLE (16). Diuretics and beta-blockers have not  
10  
11 been widely studied in hypertensive SLE patients. While they can be efficacious, they may cause  
12  
13 photosensitivity, a common comorbidity in SLE, with early reports suggesting they may trigger  
14  
15 cutaneous lupus (18). Beta-blockers may also worsen Raynaud's phenomenon, which is prevalent  
16  
17 in SLE. Of note, many of our patients received combination HTN therapies.  
18  
19  
20  
21  
22

23 In our cohort, Caucasians were more likely to have uncontrolled HTN. This finding differs  
24  
25 from previous studies in SLE, which found that race/ethnicity groups traditionally at high risk of  
26  
27 suboptimal BP control, such as African Americans, were indeed more likely to have resistant HTN  
28  
29 (5). However, Caucasian race has not always been associated with good HTN control in the  
30  
31 general American population (19). The observed associations between Caucasian race/ethnicity  
32  
33 and uncontrolled HTN in our SLE sample may suggest that non-Caucasians were aggressively  
34  
35 treated, perhaps because of the knowledge that this demographic is susceptible to poor  
36  
37 outcomes. In addition, renal damage in our cohort was negatively associated with uncontrolled  
38  
39 HTN (OR 0.39 95% CI 0.16-0.97), which is reassuring as controlling BP is key to preventing further  
40  
41 renal damage. Although our analysis has adjusted for renal disease, this result may contribute to  
42  
43 why Caucasian patients, with less renal damage than non-Caucasians, had poorer blood pressure  
44  
45 control. We noted that patients with higher BMI were more likely to have poor BP control (OR  
46  
47 1.08, 95% CI 1.00-1.19). Risk factors for uncontrolled HTN were analyzed according to ACC/AHA  
48  
49 guidelines, as they recommend a lower blood pressure target, which could be beneficial to SLE  
50  
51  
52  
53  
54  
55  
56  
57  
58  
59  
60

1  
2  
3 patients given the increased risk of cardiovascular disease. Of note, current published HTN  
4  
5 guidelines do not specifically provide a target for SLE patients, therefore studies aiming to define  
6  
7 a target are needed. We could not draw definitive conclusions on the other variables assessed as  
8  
9 the 95% CIs were imprecise and included the null value.  
10  
11

12  
13 Potential limitations to our study should be noted. Our study was cross-sectional, and the  
14  
15 blood pressure of cohort patients was taken as a single measurement at annual visits. Further  
16  
17 work using a longitudinal repeated measure design is needed to explore the effects of those  
18  
19 variables, in addition to HTN treatment, disease activity, disease damage (e.g., renal failure  
20  
21 associated with SLE), and concomitant medications (e.g. steroids, NSAIDs) on HTN in SLE. Also,  
22  
23 we studied patients from a tertiary care centre within a specialized clinic, and within the setting  
24  
25 of universal health care. The results do suggest that good BP control is possible in high-risk SLE  
26  
27 patients including non-Caucasians and those with renal damage, though this may be more  
28  
29 difficult in other settings such as non-universal health care, where problems with health care  
30  
31 access and patient adherence may create difficulties.  
32  
33  
34  
35  
36

37  
38 In summary, our cross-sectional analysis showed that 24.4% of SLE patients were  
39  
40 currently taking medications to treat HTN, and that over one-third required two or more  
41  
42 medications concurrently. Angiotensin receptor blockers, ACEI, and CCB were common  
43  
44 antihypertensive choices, and diuretics were often used despite concerns in the literature  
45  
46 regarding photosensitivity and lupus rash. Among the 108 patients taking antihypertensive  
47  
48 medications, 39.8% had suboptimal control as per Canadian guidelines and 66.7% had suboptimal  
49  
50 control as per ACC/AHA guidelines. In our cohort, Caucasian SLE patients were more likely to have  
51  
52 uncontrolled HTN, and we found a negative association between renal damage and our outcome.  
53  
54  
55  
56  
57  
58  
59  
60



1  
2  
3 The results suggest that good BP control is possible in high-risk SLE patients including non-  
4  
5 Caucasians and those with renal damage, though this may be more difficult in other settings (such  
6  
7 as non-universal health care and suboptimal care access).  
8  
9  
10  
11  
12  
13  
14  
15  
16  
17  
18  
19  
20  
21  
22  
23  
24  
25  
26  
27  
28  
29  
30  
31  
32  
33  
34  
35  
36  
37  
38  
39  
40  
41  
42  
43  
44  
45  
46  
47  
48  
49  
50  
51  
52  
53  
54  
55  
56  
57  
58  
59  
60

## References

- (1) Statistics Canada. Systematic lupus erythematosus. Available: <https://www150.statcan.gc.ca/n1/pub/82-619-m/2006003/4053548-eng.htm> [Accessed 20 May 2020].
- (2) Bruce IN, Urowitz MB, Gladman DD, et al. Risk factors for coronary heart disease in women with systemic lupus erythematosus. The Toronto Risk Factor Study. *Arthritis Rheum* 2003;48:3159–67. doi:10.1002/art.11296.
- (3) Nikpour M, Urowitz MB, Ibanez D, et al. Importance of cumulative exposure to elevated cholesterol and blood pressure in development of atherosclerotic coronary artery disease in systemic lupus erythematosus: a prospective proof-of-concept cohort study. *Arthritis Res Ther* 13, R156 (2011). doi:10.1186/ar3473.
- (4) Mok CC, Kwok RC, Yip PS. Effect of renal disease on the standardized mortality ratio and life expectancy of patients with systemic lupus erythematosus. *Arthritis Rheum*. 2013;65(8):2154-2160. doi:10.1002/art.38006.
- (5) Gandelman JS, Khan OA, Shuey MM, et al. Increased Incidence of Resistant Hypertension in Patients with Systemic Lupus Erythematosus: A Retrospective Cohort Study. *Arthritis Care Res (Hoboken)*. 2019 Mar 15;. doi:10.1002/acr.23880. [Epub ahead of print] PubMed PMID: 30875459.
- (6) Keeling SO, Vandermeer B, Medina J, et al. (2018). Measuring Disease Activity and Damage with Validated Metrics: A Systematic Review on Mortality and Damage in Systemic Lupus Erythematosus. *The Journal of Rheumatology*, 45(10), 1448–1461. doi:10.3899/jrheum.171310.
- (7) Urowitz MB, Gladman D, Ibañez D, et al. Atherosclerotic vascular events in a multinational inception cohort of systemic lupus erythematosus. *Arthritis Care Res (Hoboken)*. 2010 Jun;62(6):881-7. doi:10.1002/acr.20122.
- (8) Patterson SL, Schmajuk G, Jafri K, et al. Obesity is Independently Associated With Worse Patient-Reported Outcomes in Women with Systemic Lupus Erythematosus. *Arthritis Care Res (Hoboken)*. 2019;71(1):126-133. doi:10.1002/acr.23576.
- (9) Hochberg MC. Updating the American College of Rheumatology revised criteria for the classification of systemic lupus erythematosus. *Arthritis Rheum* 1997;40:1725. doi:10.1002/art.1780400928.
- (10) Leung AA, Daskalopoulou SS, Dasgupta K, et al. Hypertension Canada's 2017 Guidelines for Diagnosis, Risk Assessment, Prevention, and Treatment of Hypertension in Adults [published correction appears in *Can J Cardiol*. 2017 Dec;33(12 ):1733-1734]. *Can J Cardiol*. 2017;33(5):557-576. doi:10.1016/j.cjca.2017.03.005.
- (11) Whelton PK, et al., 2017 ACC/AHA/AAPA/ABC/ACPM/AGS/APhA/ASH/ASPC/NMA/PCNA Guideline for the Prevention, Detection, Evaluation, and Management of High Blood Pressure in

1  
2  
3 Adults: A Report of the American College of Cardiology/American Heart Association Task Force on  
4 Clinical Practice Guidelines. *J Am Coll Cardiol*, 2018. 71(19): p. e127- e248.  
5 doi:10.1161/HYP.0000000000000065.  
6

- 7  
8 (12) Gladman DD, Ibañez D, Urowitz MB. Systemic lupus erythematosus disease activity index 2000. *J*  
9 *Rheumatol*. 2002 Feb;29(2):288-91.  
10  
11 (13) Chaiamnuay S, Bertoli AM, Roseman JM, et al. African–American and Hispanic ethnicities, renal  
12 involvement and obesity predispose to hypertension in systemic lupus erythematosus: results  
13 from LUMINA, a multiethnic cohort (LUMINAXLV) *Annals of the Rheumatic Diseases* 2007;66:618-  
14 622. doi:10.1136/ard.2006.059311.  
15  
16 (14) Petri M. Detection of coronary artery disease and the role of traditional risk factors in the  
17 Hopkins Lupus Cohort. *Lupus*. 2000;9(3):170-175. doi:10.1191/096120300678828226.  
18  
19 (15) Asanuma Y, Oeser A, Shintani AK, et al. Premature coronary-artery atherosclerosis in systemic  
20 lupus erythematosus. *N Engl J Med*. 2003;349(25):2407-2415. doi:10.1056/NEJMoa035611.  
21  
22 (16) Tselios K, Koumaras C, Urowitz M, et al. (2013). Do current arterial hypertension treatment  
23 guidelines apply to systemic lupus erythematosus patients? A critical appraisal. *Seminars in*  
24 *arthritis and rheumatism*. doi:43.10.1016/j.semarthrit.2013.07.007.  
25  
26 (17) Tse K C, Li FK, Tang S, et al. (2005). Angiotensin inhibition or blockade for the treatment of  
27 patients with quiescent lupus nephritis and persistent proteinuria. *Lupus*, 14(12), 947–952.  
28 doi:10.1191/0961203305lu2249oa.  
29  
30 (18) Sontheimer RD, Henderson CL, Grau RH. Drug-induced subacute cutaneous lupus erythematosus:  
31 a paradigm for bedside-to-bench patient-oriented translational clinical investigation. *Arch*  
32 *Dermatol Res* 301, 65 (2009). doi:10.1007/s00403-008-0890-x.  
33  
34 (19) Knight EL, Bohn RL, Wang PS, et al. Predictors of uncontrolled hypertension in ambulatory  
35 patients. *Hypertension*. 2001;38(4):809-814. doi:10.1161/hy0901.091681.  
36  
37  
38  
39  
40  
41  
42  
43  
44  
45  
46  
47  
48  
49  
50  
51  
52  
53  
54  
55  
56  
57  
58  
59  
60

## Tables

Table 1. Characteristics of the 108 SLE patients treated for HTN, controlled vs. uncontrolled HTN (&gt;130/80 mmHg).

| Variables                              | All patients<br>N=108 | Controlled,<br>N= 36 | Uncontrolled,<br>N=72 | Differences<br>(95% CI) <sup>a</sup> |
|----------------------------------------|-----------------------|----------------------|-----------------------|--------------------------------------|
| Male sex, N (%)                        | 18 (16.7)             | 6 (16.7)             | 12 (16.7)             | <b>&lt;0.01 (-0.17, 0.14)</b>        |
| Caucasian<br>race/ethnicity, N (%)     | 71 (65.7)             | 19 (52.8)            | 52 (72.2)             | <b>0.19 (0.00, 0.38)</b>             |
| Age at last visit > 65<br>years, N (%) | 45 (41.7)             | 12 (33.3)            | 33 (45.8)             | <b>0.12 (-0.07, 0.30)</b>            |
| Mean body mass index,<br>BMI (SD)      | 26.6 (5.2)            | 25.6 (5.1)           | 27.1 (5.2)            | <b>2.04 (-0.42, 4.17)</b>            |
| Mean SLE duration,<br>years (SD)       | 23.5 (14.2)           | 23.1 (15.2)          | 23.7 (13.8)           | <b>0.94 (-5.01, 6.96)</b>            |
| SLEDAI-2K ≥4, N (%)                    | 48 (44.4)             | 18 (50.0)            | 30 (41.7)             | <b>0.08 (-0.11, 0.27)</b>            |
| Renal damage ≥1, N<br>(%)              | 32 (29.6)             | 16 (44.4)            | 16 (22.2)             | <b>0.22 (0.04, 0.40)</b>             |
| Prednisone use, N (%)                  | 16 (14.8)             | 5 (13.9)             | 11 (15.3)             | <b>0.01 (-0.15, 0.14)</b>            |
| NSAIDs use, N (%)                      | 5 (4.6)               | 1 (2.8)              | 4 (5.6)               | <b>0.03 (-0.09, 0.11)</b>            |
| Using >1 BP<br>medication, N (%)       | 38 (35.2)             | 10 (27.8)            | 28 (38.9)             | <b>0.11 (-0.08, 0.28)</b>            |
| Mean Systolic BP, (SD)                 | 134.2 (18.2)          | 116.0 (9.4)          | 143.2 (14.3)          | <b>26.0 (21.0, 31.0)</b>             |
| Mean Diastolic BP,<br>(SD)             | <b>79.9 (10.8)</b>    | <b>70.7 (6.3)</b>    | <b>84.6 (9.5)</b>     | <b>13.0 (10.0, 16.0)</b>             |

<sup>a</sup> The difference in proportions between groups (Controlled (n = 36) and Uncontrolled (n = 72) as well as their 95% confidence intervals. This analysis was performed using the Newcombe-Wilson score method. For continuous variables. For continuous variables (body mass index, SLE duration, systolic BP and diastolic BP), we used the Wilcoxon test to determine the confidence intervals for the difference.

Table 2. Logistic regression of SLE patients treated for HTN: Odds Ratios (OR) for uncontrolled HTN (>130/80 mmHg).

| VARIABLES                    | UNADJUSTED OR<br>(95% CI) | ADJUSTED OR<br>(95% CI) <sup>a</sup> |
|------------------------------|---------------------------|--------------------------------------|
| MALE SEX                     | 1.00 (0.35-3.11)          | 1.27 (0.42-4.24)                     |
| CAUCASIAN RACE/ETHNICITY     | <b>2.33 (1.01-5.40)</b>   | <b>2.72 (1.12-6.78)</b>              |
| AGE AT LAST VISIT > 65 YEARS | 1.69 (0.74-3.99)          | 1.68 (0.71-4.08)                     |
| BODY MASS INDEX              | 1.06 (0.98-1.15)          | <b>1.08 (1.00-1.19)</b>              |
| SLE DURATION (YEARS)         | 1.00 (0.97-1.03)          | 0.99 (0.96-1.02)                     |
| SLEDAI-2K ≥ 4                | 0.71 (0.32-1.60)          | 0.77 (0.33-1.76)                     |
| RENAL DAMAGE ≥ 1             | <b>0.36 (0.15-0.84)</b>   | <b>0.39 (0.16-0.97)</b>              |
| USING MORE >1 BP MEDICATION  | 1.65 (0.71-4.08)          | 1.54 (0.63-3.96)                     |
| PREDNISONE                   | 1.12 (0.37-3.81)          | 1.17 (0.38-4.14)                     |
| NSAIDS                       | 2.06 (0.29-41.10)         | 1.99 (0.26-41.0)                     |

<sup>a</sup> Adjusted for: age at last visit, sex and race/ethnicity.

**STROBE 2007 (v4) Statement—Checklist of items that should be included in reports of *cohort studies***

| Section/Topic                | Item # | Recommendation                                                                                                                                                                       | Reported on page # |
|------------------------------|--------|--------------------------------------------------------------------------------------------------------------------------------------------------------------------------------------|--------------------|
| <b>Title and abstract</b>    | 1      | (a) Indicate the study's design with a commonly used term in the title or the abstract                                                                                               | 3                  |
|                              |        | (b) Provide in the abstract an informative and balanced summary of what was done and what was found                                                                                  | 3                  |
| <b>Introduction</b>          |        |                                                                                                                                                                                      |                    |
| Background/rationale         | 2      | Explain the scientific background and rationale for the investigation being reported                                                                                                 | 5                  |
| Objectives                   | 3      | State specific objectives, including any prespecified hypotheses                                                                                                                     | 5                  |
| <b>Methods</b>               |        |                                                                                                                                                                                      |                    |
| Study design                 | 4      | Present key elements of study design early in the paper                                                                                                                              | 5                  |
| Setting                      | 5      | Describe the setting, locations, and relevant dates, including periods of recruitment, exposure, follow-up, and data collection                                                      | 5, 6               |
| Participants                 | 6      | (a) Give the eligibility criteria, and the sources and methods of selection of participants. Describe methods of follow-up                                                           | 6                  |
|                              |        | (b) For matched studies, give matching criteria and number of exposed and unexposed                                                                                                  | n/a                |
| Variables                    | 7      | Clearly define all outcomes, exposures, predictors, potential confounders, and effect modifiers. Give diagnostic criteria, if applicable                                             | 5, 6               |
| Data sources/<br>measurement | 8*     | For each variable of interest, give sources of data and details of methods of assessment (measurement). Describe comparability of assessment methods if there is more than one group | 5                  |
| Bias                         | 9      | Describe any efforts to address potential sources of bias                                                                                                                            | 5, 6               |
| Study size                   | 10     | Explain how the study size was arrived at                                                                                                                                            | 7                  |
| Quantitative variables       | 11     | Explain how quantitative variables were handled in the analyses. If applicable, describe which groupings were chosen and why                                                         | 6                  |
| Statistical methods          | 12     | (a) Describe all statistical methods, including those used to control for confounding                                                                                                | 6                  |
|                              |        | (b) Describe any methods used to examine subgroups and interactions                                                                                                                  | 6                  |
|                              |        | (c) Explain how missing data were addressed                                                                                                                                          | n/a                |
|                              |        | (d) If applicable, explain how loss to follow-up was addressed                                                                                                                       | n/a                |
|                              |        | (e) Describe any sensitivity analyses                                                                                                                                                | n/a                |
| <b>Results</b>               |        |                                                                                                                                                                                      |                    |

|                          |     |                                                                                                                                                                                                              |     |
|--------------------------|-----|--------------------------------------------------------------------------------------------------------------------------------------------------------------------------------------------------------------|-----|
| Participants             | 13* | (a) Report numbers of individuals at each stage of study—eg numbers potentially eligible, examined for eligibility, confirmed eligible, included in the study, completing follow-up, and analysed            | 7   |
|                          |     | (b) Give reasons for non-participation at each stage                                                                                                                                                         | n/a |
|                          |     | (c) Consider use of a flow diagram                                                                                                                                                                           | n/a |
| Descriptive data         | 14* | (a) Give characteristics of study participants (eg demographic, clinical, social) and information on exposures and potential confounders                                                                     | 7   |
|                          |     | (b) Indicate number of participants with missing data for each variable of interest                                                                                                                          | n/a |
|                          |     | (c) Summarise follow-up time (eg, average and total amount)                                                                                                                                                  | 7   |
| Outcome data             | 15* | Report numbers of outcome events or summary measures over time                                                                                                                                               | 7   |
| Main results             | 16  | (a) Give unadjusted estimates and, if applicable, confounder-adjusted estimates and their precision (eg, 95% confidence interval). Make clear which confounders were adjusted for and why they were included | 6   |
|                          |     | (b) Report category boundaries when continuous variables were categorized                                                                                                                                    | 7   |
|                          |     | (c) If relevant, consider translating estimates of relative risk into absolute risk for a meaningful time period                                                                                             | n/a |
| Other analyses           | 17  | Report other analyses done—eg analyses of subgroups and interactions, and sensitivity analyses                                                                                                               | n/a |
| <b>Discussion</b>        |     |                                                                                                                                                                                                              |     |
| Key results              | 18  | Summarise key results with reference to study objectives                                                                                                                                                     | 8   |
| <b>Limitations</b>       |     |                                                                                                                                                                                                              |     |
| Interpretation           | 20  | Give a cautious overall interpretation of results considering objectives, limitations, multiplicity of analyses, results from similar studies, and other relevant evidence                                   | 8,9 |
| Generalisability         | 21  | Discuss the generalisability (external validity) of the study results                                                                                                                                        | 10  |
| <b>Other information</b> |     |                                                                                                                                                                                                              |     |
| Funding                  | 22  | Give the source of funding and the role of the funders for the present study and, if applicable, for the original study on which the present article is based                                                | 1   |

\*Give information separately for cases and controls in case-control studies and, if applicable, for exposed and unexposed groups in cohort and cross-sectional studies.

**Note:** An Explanation and Elaboration article discusses each checklist item and gives methodological background and published examples of transparent reporting. The STROBE checklist is best used in conjunction with this article (freely available on the Web sites of PLoS Medicine at <http://www.plosmedicine.org/>, Annals of Internal Medicine at <http://www.annals.org/>, and Epidemiology at <http://www.epidem.com/>). Information on the STROBE Initiative is available at [www.strobe-statement.org](http://www.strobe-statement.org).
